# Supplementary material for: Analysis of Protein Disorder Predictions in the Light of a Protein Structural Alphabet
Source: PubMed Central journal article supplement (PMC7408373; doi:10.3390/biom10071080), 2020-07-20
Supplement: biomolecules-10-01080-s001.pdf [file biomolecules-10-01080-s001.pdf]

## **Supplementary Material**

**Title:** Analysis of Protein Disorder Predictions in the Light of a Protein Structural Alphabet

**Author:** Alexandre G. de Brevern

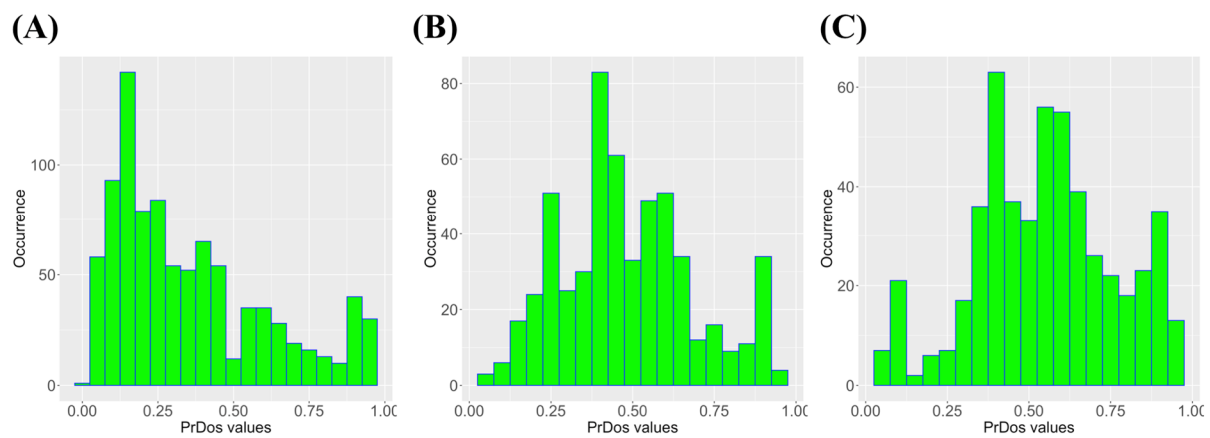

**Figure S1.** Prediction disorder results of PrDOS on PED<sup>3</sup> dataset. For  $N_{eq}$  (A) lower than 4, (B) between 4 and 8 and (C) higher than 8.

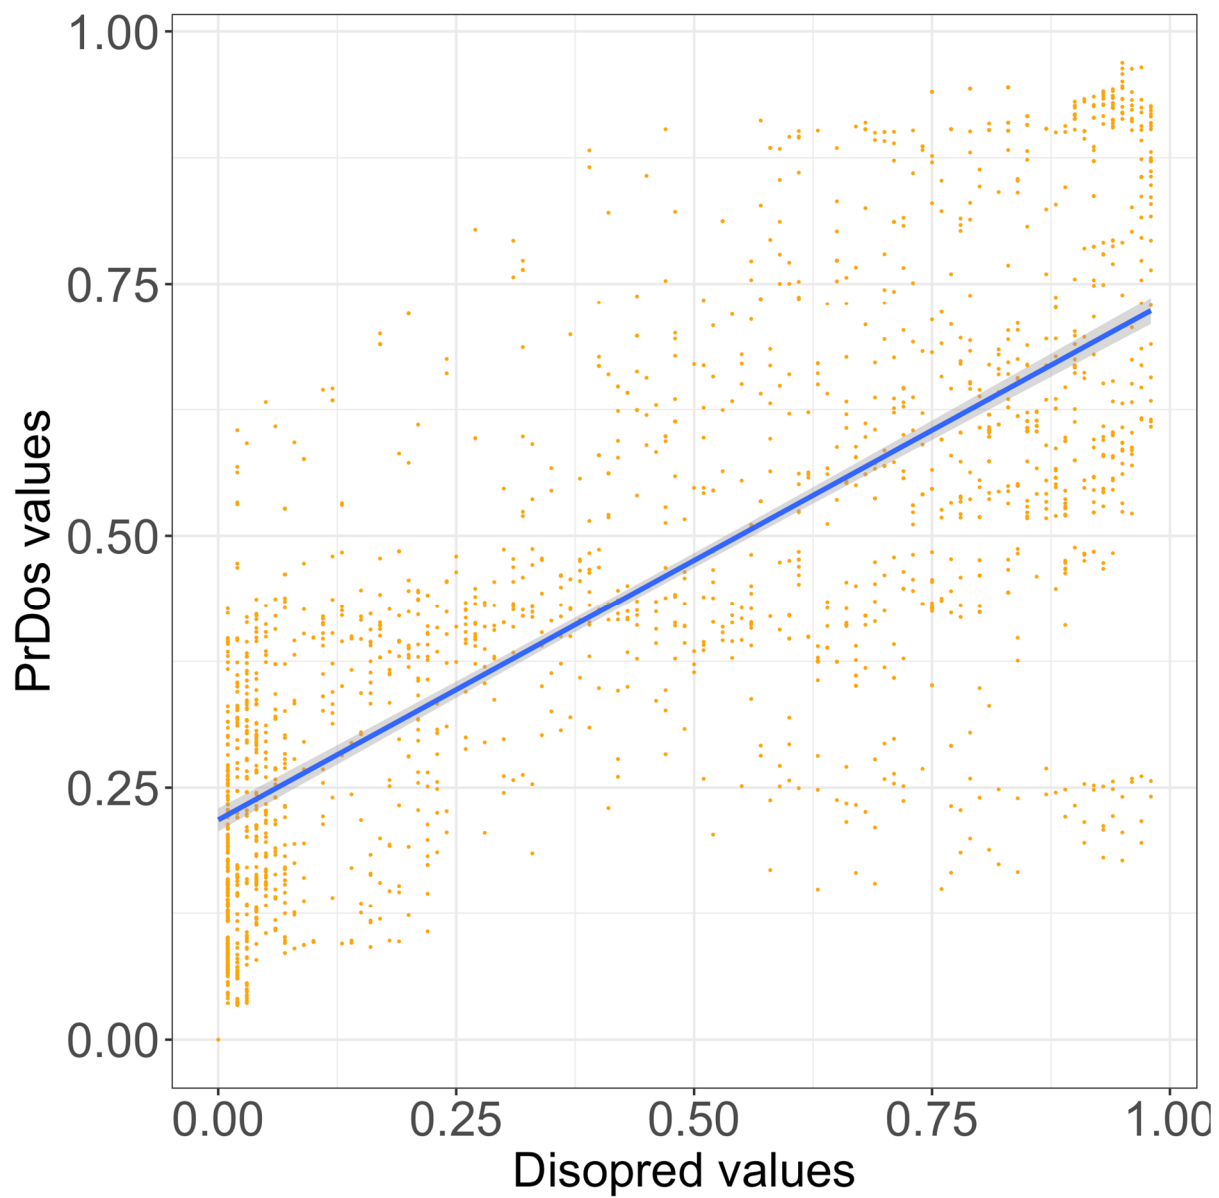

**Figure S2.** Prediction disorder results on PED<sup>3</sup> dataset. (A) DisoPred3 values (x-axis) against PrDOS values (y-axis) for  $N_{\text{eq}}$  values higher than 8 (correlation is of 0.76).

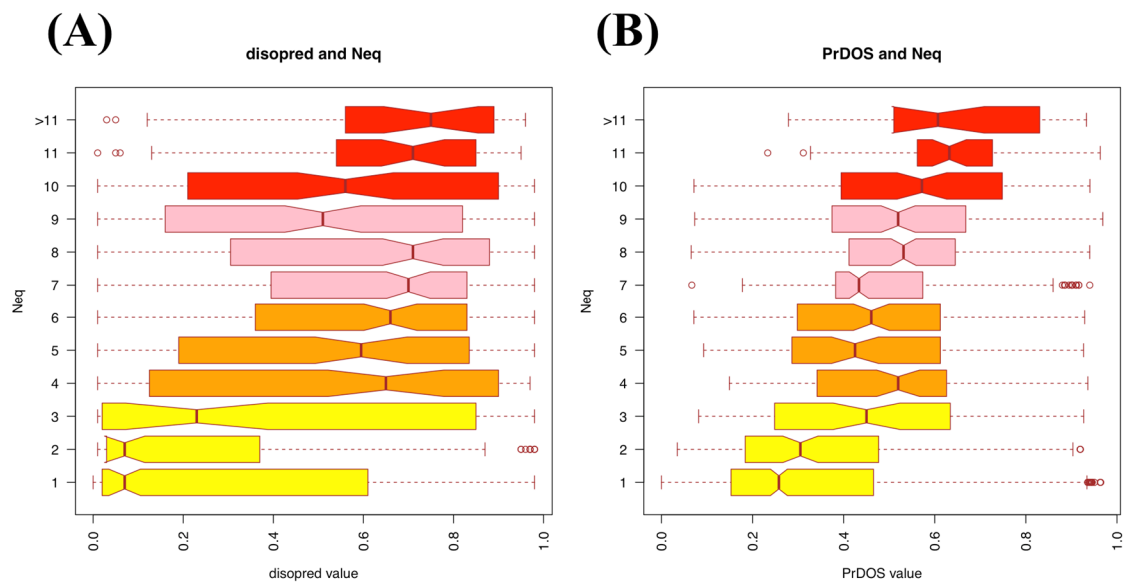

**Figure S3.** Analyses of prediction disorder results on PED<sup>3</sup> dataset per class of  $N_{eq}$ . (A) DisoPred3 values (x-axis) and  $N_{eq}$  classes (y-axis). (B) PrDOS values (x-axis) and  $N_{eq}$  classes (y-axis).

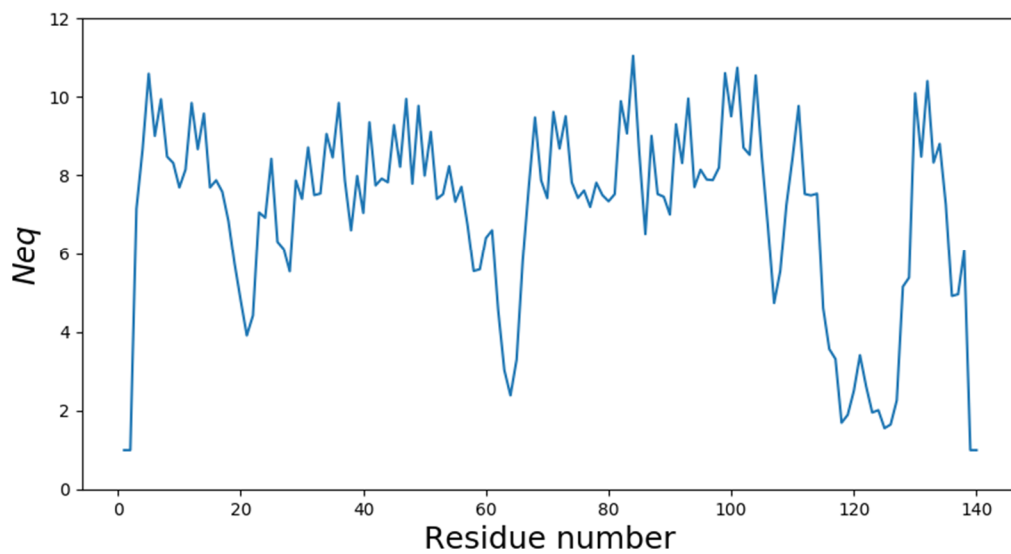

**Figure S4.**  $N_{eq}$  values for the alpha-synuclein, a solution-state ensemble from PRE-NMR ensemble-restrained MD simulations (PED<sup>3</sup> 9AAC entry). Computation done with PBxplore software.



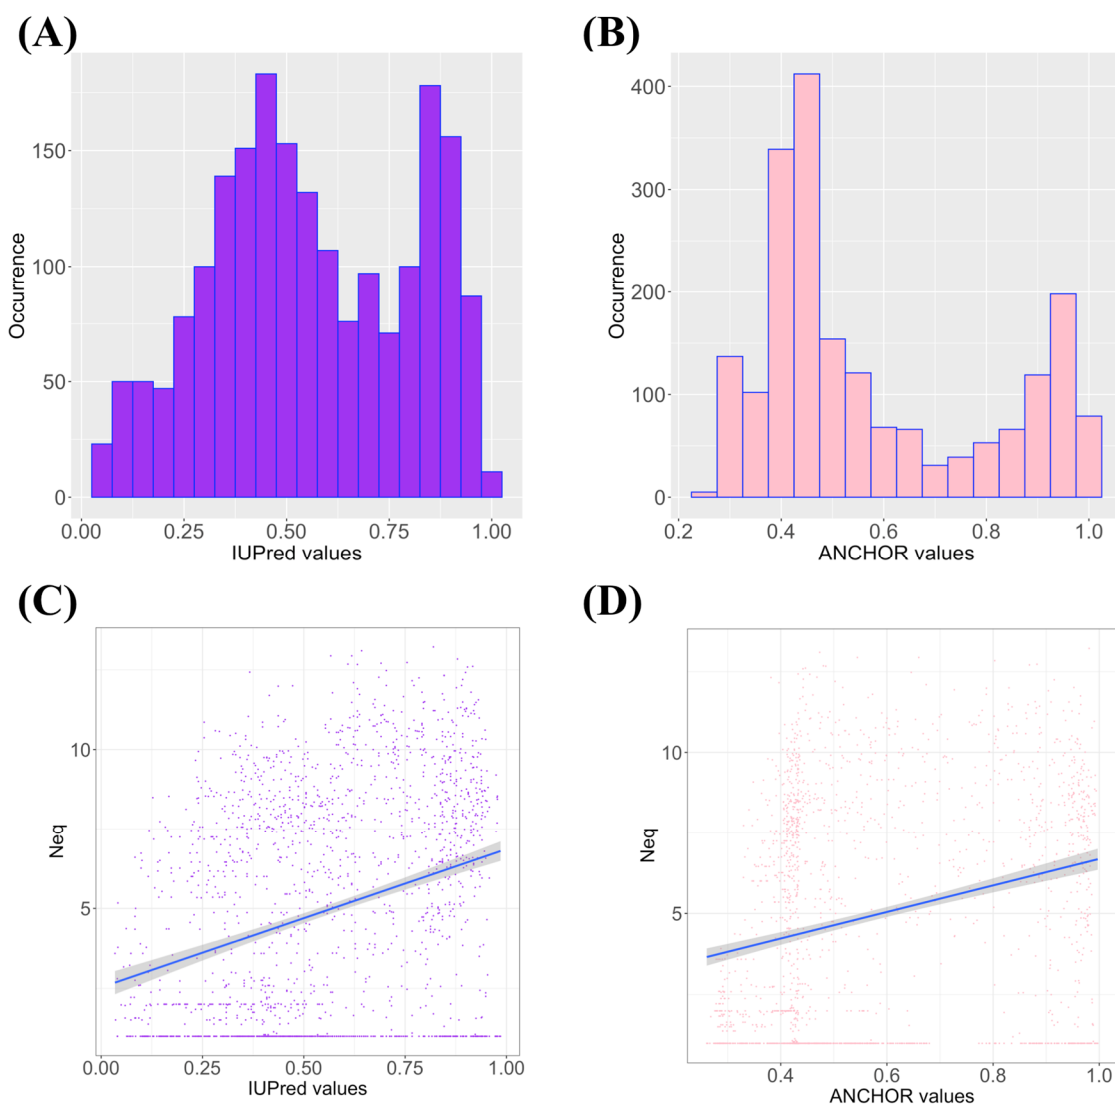

**Figure S6.** Distribution of  $N_{eq}$  and prediction disorder values &  $N_{eq}$  versus prediction disorder results. Distribution of (A) IUPred2A values (in purple), and (B) ANCHOR2 values (in pink), (C)  $N_{eq}$  values (x-axis) against IUPred2A values (y-axis) (correlation equals to 0.29). (D)  $N_{eq}$  values (x-axis) against ANCHOR2 values (y-axis) (correlation equals to 0.25).

|                 | $N_{\text{eq}}$ | DisoPred    | PrDOS       | IUPred2A    | ANCHOR2 |
|-----------------|-----------------|-------------|-------------|-------------|---------|
| $N_{\text{eq}}$ | --              |             |             |             |         |
| DisoPred        | <b>0.37</b>     | --          |             |             |         |
| PrDOS           | <b>0.34</b>     | <b>0.75</b> | --          |             |         |
| IUPred2A        | <b>0.29</b>     | 0.56        | 0.65        | --          |         |
| ANCHOR2         | <b>0.25</b>     | 0.49        | <u>0.44</u> | <b>0.79</b> | --      |

**Table S1.** Correlation between  $N_{\text{eq}}$ , Disopred3, PrDOS, IUPred2A and ANCHOR2 values on PED<sup>3</sup> dataset.



| Neq             | 1.0          | >2.0         | >3.0         | >4.0         | >5.0         | >6.0         | >7.0         | >8.0         | >9.0         | >10.0        | >11.0        | >12.0        |
|-----------------|--------------|--------------|--------------|--------------|--------------|--------------|--------------|--------------|--------------|--------------|--------------|--------------|
| Prediction      | <b>61.39</b> | <b>42.43</b> | <b>38.71</b> | <b>38.36</b> | <b>38.51</b> | <b>37.31</b> | <b>36.65</b> | <b>34.39</b> | <b>34.99</b> | <b>35.14</b> | <b>36.40</b> | <b>37.96</b> |
| <i>Order</i>    | 100.00       | 55.61        | 46.68        | 43.57        | 39.97        | 34.89        | 27.85        | 17.69        | 10.65        | 4.50         | 1.23         | 0.49         |
| <i>Disorder</i> | 0.00         | 21.48        | 26.04        | 30.08        | 36.20        | 41.15        | 50.65        | 60.94        | 73.70        | 83.85        | 92.32        | 97.53        |

**Table S2.** Evaluation of prediction rate according to  $N_{eq}$  values for Disopred3 approach.
